# Supplementary material
Source: publisher site journal article supplement (https://www.dovepress.com/article/235436)
Supplement: Supplementary file 1 [file get_supplementary_file.php]

**Appendix 1**

**Section A**

Below are listed some behaviors that a person with diabetes could perform to maintain health and wellness. Please indicate how often or routinely you do these behaviors**.** (Circle one number).

| **Always** |  |  |  | **Never** | **Items** |
| --- | --- | --- | --- | --- | --- |
| **5** | **4** | **3** | **2** | **1** |
| **5** | **4** | **3** | **2** | **1** | 1-Maintaining an active lifestyle (e.g. walking, going outside, doing physical activities). |
| **5** | **4** | **3** | **2** | **1** | 2- Eating a balanced diet of carbohydrates (pasta, rice, sugar, and bread), proteins (meat, fish, and beans), and fruits and vegetables. |
| **5** | **4** | **3** | **2** | **1** | 3- Exercising 2.5 hours a week (e.g. swimming, going to the gym, cycling, and walking). |
| **5** | **4** | **3** | **2** | **1** | 4- Avoiding salt and fat (e.g. cheese, pure meat, sweets, and red meat). |
| **5** | **4** | **3** | **2** | **1** | 5- Many people have difficulty taking all the medications prescribed for them. Do you take all the medication prescribed by your doctor? (If you take insulin, please consider it too). |
| **5** | **4** | **3** | **2** | **1** | 6- Visiting your doctor regularly. |
| **5** | **4** | **3** | **2** | **1** | 7- Trying to avoid illness (e.g. washing hands regularly, receiving the recommended vaccines). |
| **5** | **4** | **3** | **2** | **1** | 8- Taking care of your feet (washing and drying your feet regularly, keeping your feet wet, wearing proper socks). |
| **5** | **4** | **3** | **2** | **1** | 9- Limiting your use of non-alcoholic drinks containing high sugar levels or alcoholic drinks (less than one glass for women and two glasses for men). |
| **5** | **4** | **3** | **2** | **1** | 10- Avoiding smoking cigarettes and hookah. |
| **5** | **4** | **3** | **2** | **1** | 11- Regular health checkup (e.g. blood test, urine test, sonography, and eye examination). |
| **5** | **4** | **3** | **2** | **1** | 12- Taking care of your teeth and mouth (e.g. brushing your teeth at least twice a day, use of mouthwash, use of dental floss). |

**Section B**

Below are some behaviors that a person with diabetes could practice to monitor their diabetes. Please indicate how often you do these behaviors. (Circle one number).

| **Very quickly** |  |  |  | **Not quickly** | **I didn’t**  **recognize**  **symptoms** | | **Items** |
| --- | --- | --- | --- | --- | --- | --- | --- |
| **5** | **4** | **3** | **2** | **1** | | **0** |
| **5** | **4** | **3** | **2** | **1** | | **0** | 13-How fast did you notice the symptoms of high blood sugar (thirst, frequent urination) or low blood sugar (weakness, sweating, and anxiety)? |
| **5** | **4** | **3** | **2** | **1** | | **0** | 14- How fast did you notice that your symptoms were caused by diabetes? |

| **Always** |  | |  | |  | **Never** |  |
| --- | --- | --- | --- | --- | --- | --- | --- |
| **5** | **4** | | **3** | | **2** | **1** |
| **5** | | **4** | **3** | **2** | | **1** | 15- Monitor your weight |
| **5** | | **4** | **3** | **2** | | **1** | 16- Monitor your blood pressure? |
| **5** | | **4** | **3** | **2** | | **1** | 17- Monitor your blood sugar |
| **5** | | **4** | **3** | **2** | | **1** | 18- Monitor your feet for injuries, red spots, or blisters on a daily basis? |
| **5** | | **4** | **3** | **2** | | **1** | 19- Write down your blood sugar levels? |
| **5** | | **4** | **3** | **2** | | **1** | 20- Notice the symptoms of high blood sugar (thirst, frequent urination) and low blood sugar (weakness, sweating, and anxiety)? |

**Section C**
Below are listed some behaviors a person with diabetes could do to improve their blood sugar when it’s too high or too low. How often you do (or you would do) these actions when symptoms occur or when your blood sugar is out of range? (Circle one number).

| **Always** | |  |  |  | **Never** | **Items** |
| --- | --- | --- | --- | --- | --- | --- |
| **5** | | **4** | **3** | **2** | **1** |
| **5** | **4** | | **3** | **2** | **1** | 21- When you experience the symptoms of diabetes and notice that your blood sugar is too high, do you balance your diet to control it? |
| **5** | **4** | | **3** | **2** | **1** | 22- If you notice that your blood sugar is too high, do you engage in physical activity to control it? |
| **5** | **4** | | **3** | **2** | **1** | 23- When you experience symptoms and notice that your blood sugar is too low, do you eat a food or drink a beverage high in sugar to solve this problem? |
| **5** | **4** | | **3** | **2** | **1** | 24- Checking your blood sugar when experiencing such symptoms as thirst, frequent urination, weakness, sweating, and anxiety. |
| **5** | **4** | | **3** | **2** | **1** | 25- After using some strategies to adjust your abnormal blood sugar levels, do you examine it again to see if the things you have done were effective? |
| **5** | **4** | | **3** | **2** | **1** | 26- When your blood sugar is not in the normal range, do you take note of the things or behaviors causing it? |
| **5** | **4** | | **3** | **2** | **1** | 27- When your blood sugar is not in the normal range, do you consult with your family members or friends? |
| **5** | **4** | | **3** | **2** | **1** | 28- If you notice that your blood sugar is too high or low, do you consult your doctor about it? |
| Do you take insulin? Yes No; If yes, please answer the following question. | | | | | | |
| **5** | **4** | | **3** | **2** | **1** | 29- If you notice that your blood sugar is too high or low, do you adjust your insulin doses according to what your doctor has prescribed? |

**Section D**

People with diabetes have to develop skills to take care of themselves and to maintain their health. How confident do you feel doing the following activities? (Circle one number).

| **Extremely confident** |  |  | |  | **Not confident at all** | **Items** |
| --- | --- | --- | --- | --- | --- | --- |
| **5** | **4** | **3** | | **2** | **1** |
| **5** | **4** | **3** | **2** | | **1** | 30- Detecting the symptoms of low blood sugar. |
| **5** | **4** | **3** | **2** | | **1** | 31- Preventing blood sugar levels from going too high or low and related symptoms. |
| **5** | **4** | **3** | **2** | | **1** | 32- Monitoring your blood sugar levels according to your doctor’s order. |
| **5** | **4** | **3** | **2** | | **1** | 33- Taking your medications correctly (including insulin, if prescribed for you). |
| **5** | **4** | **3** | **2** | | **1** | 34- Adhering to recommendations about diet and psychical activity. |
| **5** | **4** | **3** | **2** | | **1** | 35- Engaging in activities that adjust your blood sugar levels and improve your symptoms. |
| **5** | **4** | **3** | **2** | | **1** | 36- Examining whether your strategies to adjust blood sugar levels and improve your symptoms have been effective. |
| **5** | **4** | **3** | **2** | | **1** | 37- Insisting on monitoring your diabetes, despite the possible difficulties. |
| **5** | **4** | **3** | **2** | | **1** | 38- Realizing whether your blood sugar level is in the normal range. |
| **5** | **4** | **3** | **2** | | **1** | 39- Insisting on adhering to the treatment regimen, despite the possible difficulties. |
| **5** | **4** | **3** | **2** | | **1** | 40- Insisting on doing things that improve your blood sugar, no matter how difficult they are. |

**The following is the algorithm used for scoring the SCODI:**

TOT_MAINT100=(TOT_MAINT-12)*(100/48);

TOT_MONIT100=(TOT_MONIT-6)*(100/34);

TOT_SELF_EFF100=(TOT_SELF_EFF-11)*(100/44);

If insulina=0 then do;

 TOT_MANAG100=(TOT_MANAG-8)*(100/32);

 TOT_SCoDI100=(TOT_SCoDI-39)*(100/156);

 end;

else do;

 TOT_MANAG100=(TOT_MANAG-9)*(100/36);

 TOT_SCoDI100=(TOT_SCoDI-40)*(100/160);

 end;

In general, to standardize a scale score, 1) determine the maximum possible scale score, 2) subtract the number of items from the possible score, and 3) divide 100 by that result to identify a constant for that scale. To score the scale, sum item responses, subtract the number of items answered, and multiply by the constant.
